# Supplementary material for: Modulation of extracellular matrix/adhesion molecule expression by BRG1 is associated with increased melanoma invasiveness
Source: Mol Cancer. 2010 Oct 22;9:280. doi: 10.1186/1476-4598-9-280 (PMC3098014; doi:10.1186/1476-4598-9-280)
Supplement: Additional File 2 — Extracellular Matrix and Adhesion molecule RT2 Profiler PCR Array. The expression of 84 extracellular and adhesion molecule related genes was profiled in control SK-MEL5 (empty vector) and BRG1 reconstituted SK-MEL5 cells using a focused qPCR array. For each primer set, the fold change in SK-MEL5+BRG1 cells was determined relative to values obtained in control SK-MEL5 cells +empty vector. Statistical significance was calculated using the student's t test (* indicates p < 0.05, **indicates p < 0.01). All other values were found to be not significantly different. Expression of genes that were activated by BRG1 greater than 2 fold are highlighted in red. Expression of genes that were down-regulated by BRG1 at least 2 fold are highlighted in green. N.D. represents genes that were not detected by the qRT-PCR assay or that had CT values > 34. [file 1476-4598-9-280-S2.XLSX]

## Sheet: Sheet1
Position	Unigene	GeneBank	Symbol	Description	Fold change	SD	p-Value
A01	Hs.643357	NM_006988	ADAMTS1	ADAM metallopeptidase with thrombospondin type 1 motif, 1	0.726912	0.0445473	**
A02	Hs.131433	NM_139025	ADAMTS13	ADAM metallopeptidase with thrombospondin type 1 motif, 13	3.89114	0.906006	**
A03	Hs.271605	NM_007037	ADAMTS8	ADAM metallopeptidase with thrombospondin type 1 motif, 8	1.05702	0.769679
A04	Hs.502328	NM_000610	CD44	CD44 molecule (Indian blood group)	2.52149	0.523827	*
A05	Hs.461086	NM_004360	CDH1	Cadherin 1, type 1, E-cadherin (epithelial)	17.5648	2.72072	**
A06	Hs.143434	NM_001843	CNTN1	Contactin 1	1.61113	0.273486	*
A07	Hs.523446	NM_080629	COL11A1	Collagen, type XI, alpha 1	1.137	0.263792
A08	Hs.101302	NM_004370	COL12A1	Collagen, type XII, alpha 1	1.11755	0.592496
A09	Hs.409662	NM_021110	COL14A1	Collagen, type XIV, alpha 1	0.938859	0.156209
A10	Hs.409034	NM_001855	COL15A1	Collagen, type XV, alpha 1	2.29244	0.697476	*
A11	Hs.368921	NM_001856	COL16A1	Collagen, type XVI, alpha 1	1.89489	0.270439	*
A12	Hs.172928	NM_000088	COL1A1	Collagen, type I, alpha 1	0.819592	0.168682
B01	Hs.508716	NM_001846	COL4A2	Collagen, type IV, alpha 2	1.17674	0.209363
B02	Hs.210283	NM_000093	COL5A1	Collagen, type V, alpha 1	6.57106	2.19958	*
B03	Hs.474053	NM_001848	COL6A1	Collagen, type VI, alpha 1	0.955251	0.21254
B04	Hs.420269	NM_001849	COL6A2	Collagen, type VI, alpha 2	0.939903	0.0544905
B05	Hs.476218	NM_000094	COL7A1	Collagen, type VII, alpha 1	2.77118	1.52529
B06	Hs.654548	NM_001850	COL8A1	Collagen, type VIII, alpha 1	4.78529	1.79563	*
B07	Hs.643801	NM_004385	VCAN	Versican	0.145695	0.0116308	**
B08	Hs.591346	NM_001901	CTGF	Connective tissue growth factor	0.529983	0.105218	**
B09	Hs.534797	NM_001903	CTNNA1	Catenin (cadherin-associated protein), alpha 1, 102kDa	1.1327	0.232004
B10	Hs.476018	NM_001904	CTNNB1	Catenin (cadherin-associated protein), beta 1, 88kDa	1.32328	0.386618
B11	Hs.166011	NM_001331	CTNND1	Catenin (cadherin-associated protein), delta 1	1.16855	0.247646
B12	Hs.314543	NM_001332	CTNND2	Catenin (cadherin-associated protein), delta 2 (neural plakophilin-related arm-repeat protein)	24.0095	10.1754	**
C01	Hs.81071	NM_004425	ECM1	Extracellular matrix protein 1	0.881932	0.370054
C02	Hs.203717	NM_002026	FN1	Fibronectin 1	1.16559	0.505571
C03	Hs.57697	NM_001523	HAS1	Hyaluronan synthase 1	2.01949	1.23254
C04	Hs.643447	NM_000201	ICAM1	Intercellular adhesion molecule 1	1.15926	0.383451
C05	Hs.644352	NM_181501	ITGA1	Integrin, alpha 1	0.771197	0.276148
C06	Hs.482077	NM_002203	ITGA2	Integrin, alpha 2 (CD49B, alpha 2 subunit of VLA-2 receptor)	1.53468	0.152665	**
C07	Hs.265829	NM_002204	ITGA3	Integrin, alpha 3 (antigen CD49C, alpha 3 subunit of VLA-3 receptor)	5.40621	1.86605	**
C08	Hs.694732	NM_000885	ITGA4	Integrin, alpha 4 (antigen CD49D, alpha 4 subunit of VLA-4 receptor)	0.16217	0.0651287	**
C09	Hs.505654	NM_002205	ITGA5	Integrin, alpha 5 (fibronectin receptor, alpha polypeptide)	1.27139	0.266948
C10	Hs.133397	NM_000210	ITGA6	Integrin, alpha 6	0.593586	0.0977245	*
C11	Hs.524484	NM_002206	ITGA7	Integrin, alpha 7	8.99414	2.22729	**
C12	Hs.171311	NM_003638	ITGA8	Integrin, alpha 8	1.74171	1.51701
D01	Hs.174103	NM_002209	ITGAL	Integrin, alpha L (antigen CD11A (p180), lymphocyte function-associated antigen 1; alpha polypeptide)	0.909103	0.488641
D02	Hs.172631	NM_000632	ITGAM	Integrin, alpha M (complement component 3 receptor 3 subunit)	0.981495	0.710957
D03	Hs.436873	NM_002210	ITGAV	Integrin, alpha V (vitronectin receptor, alpha polypeptide, antigen CD51)	0.963919	0.276911
D04	Hs.643813	NM_002211	ITGB1	Integrin, beta 1 (fibronectin receptor, beta polypeptide, antigen CD29 includes MDF2, MSK12)	0.902723	0.360243
D05	Hs.375957	NM_000211	ITGB2	Integrin, beta 2 (complement component 3 receptor 3 and 4 subunit)	N.E.
D06	Hs.218040	NM_000212	ITGB3	Integrin, beta 3 (platelet glycoprotein IIIa, antigen CD61)	0.257892	0.0864436	**
D07	Hs.632226	NM_000213	ITGB4	Integrin, beta 4	1.09659	0.506252
D08	Hs.536663	NM_002213	ITGB5	Integrin, beta 5	1.14876	0.350725
D09	Hs.521869	NM_000216	KAL1	Kallmann syndrome 1 sequence	2.02902	2.16547
D10	Hs.270364	NM_005559	LAMA1	Laminin, alpha 1	0.672827	0.286179
D11	Hs.200841	NM_000426	LAMA2	Laminin, alpha 2	4.60412	2.14173	*
D12	Hs.436367	NM_000227	LAMA3	Laminin, alpha 3	2.85695	0.46847	**
E01	Hs.650585	NM_002291	LAMB1	Laminin, beta 1	1.22031	0.453109
E02	Hs.497636	NM_000228	LAMB3	Laminin, beta 3	10.5649	1.92254	**
E03	Hs.609663	NM_002293	LAMC1	Laminin, gamma 1 (formerly LAMB2)	0.884904	0.376202
E04	Hs.83169	NM_002421	MMP1	Matrix metallopeptidase 1 (interstitial collagenase)	0.0567422	0.00542854	**
E05	Hs.2258	NM_002425	MMP10	Matrix metallopeptidase 10 (stromelysin 2)	4.21286	0.0699824	**
E06	Hs.143751	NM_005940	MMP11	Matrix metallopeptidase 11 (stromelysin 3)	1.55819	1.48888
E07	Hs.1695	NM_002426	MMP12	Matrix metallopeptidase 12 (macrophage elastase)	1.71347	0.773895
E08	Hs.2936	NM_002427	MMP13	Matrix metallopeptidase 13 (collagenase 3)	0.91733	0.880204
E09	Hs.2399	NM_004995	MMP14	Matrix metallopeptidase 14 (membrane-inserted)	2.63725	0.552297	*
E10	Hs.80343	NM_002428	MMP15	Matrix metallopeptidase 15 (membrane-inserted)	0.859478	0.240217	**
E11	Hs.546267	NM_005941	MMP16	Matrix metallopeptidase 16 (membrane-inserted)	0.345111	0.0907554	**
E12	Hs.513617	NM_004530	MMP2	Matrix metallopeptidase 2 (gelatinase A, 72kDa gelatinase, 72kDa type IV collagenase)	15.8048	2.82171	**
F01	Hs.375129	NM_002422	MMP3	Matrix metallopeptidase 3 (stromelysin 1, progelatinase)	1.60495	0.132763
F02	Hs.2256	NM_002423	MMP7	Matrix metallopeptidase 7 (matrilysin, uterine)	N.E.
F03	Hs.161839	NM_002424	MMP8	Matrix metallopeptidase 8 (neutrophil collagenase)	1.68606	0.852915
F04	Hs.297413	NM_004994	MMP9	Matrix metallopeptidase 9 (gelatinase B, 92kDa gelatinase, 92kDa type IV collagenase)	2.58452	0.755432	*
F05	Hs.503878	NM_000615	NCAM1	Neural cell adhesion molecule 1	42.3171	10.3625	*
F06	Hs.514412	NM_000442	PECAM1	Platelet/endothelial cell adhesion molecule	N.E.
F07	Hs.89546	NM_000450	SELE	Selectin E	N.E.
F08	Hs.82848	NM_000655	SELL	Selectin L	1.91048	0.836734
F09	Hs.73800	NM_003005	SELP	Selectin P (granule membrane protein 140kDa, antigen CD62)	N.E.
F10	Hs.371199	NM_003919	SGCE	Sarcoglycan, epsilon	1.02476	0.123514
F11	Hs.111779	NM_003118	SPARC	Secreted protein, acidic, cysteine-rich (osteonectin)	1.17233	0.283532
F12	Hs.185597	NM_003119	SPG7	Spastic paraplegia 7 (pure and complicated autosomal recessive)	1.2981	0.271825
G01	Hs.313	NM_000582	SPP1	Secreted phosphoprotein 1	0.12209	0.0120796	**
G02	Hs.369397	NM_000358	TGFBI	Transforming growth factor, beta-induced, 68kDa	1.09352	0.463454
G03	Hs.164226	NM_003246	THBS1	Thrombospondin 1	0.116235	0.0438168	**
G04	Hs.371147	NM_003247	THBS2	Thrombospondin 2	2.71897	0.367219	**
G05	Hs.169875	NM_007112	THBS3	Thrombospondin 3	2.19602	0.717535	*
G06	Hs.522632	NM_003254	TIMP1	TIMP metallopeptidase inhibitor 1	1.81503	0.426415	*
G07	Hs.633514	NM_003255	TIMP2	TIMP metallopeptidase inhibitor 2	2.70568	0.528585	*
G08	Hs.644633	NM_000362	TIMP3	TIMP metallopeptidase inhibitor 3	5.43205	0.100795	*
G09	Hs.476092	NM_003278	CLEC3B	C-type lectin domain family 3, member B	8.59612	1.49205	**
G10	Hs.143250	NM_002160	TNC	Tenascin C	0.304839	0.0736033	**
G11	Hs.109225	NM_001078	VCAM1	Vascular cell adhesion molecule 1	N.E.
G12	Hs.2257	NM_000638	VTN	Vitronectin	1.25933	0.431066	*
